# Supplementary material for: The impact of surface melt rate and catchment characteristics on Greenland Ice Sheet moulin inputs
Source: Copernicus journal article supplement (doi:10.5194/tc-17-2607-2023), 2023-07-04
Supplement: Supplementary file 1 [file tc-17-2607-2023-supplement.zip]

Archive with 5 entries (5 files):
- Table_S3-2015.csv
- Table_S1-2011.csv
- tc-17-2607-2023-supplement-title-page.pdf
- Table_S2-2012.csv
- Table_S4-2016.csv
