# Supplementary material for: The impact of surface melt rate and catchment characteristics on Greenland Ice Sheet moulin inputs
Source: Copernicus journal article supplement (doi:10.5194/tc-17-2607-2023), 2023-07-04
Supplement: Supplementary file 1 [file tc-17-2607-2023-supplement.zip › Table_S1-2011.csv]

2011					2-hour model outputs (n=1105)
		Input			Amplitude			Lag			Lake level			Lake & moulin
Moulin	R	R2	p	R	R2	p	R	R2	p	R	R2	p	R	R2	p
1	0.38	0.14	<1e-37	-0.08	0.01	9.60E-03	0.11	0.01	0.0065	0.28	0.08	<1e-15	0.85	0.72	<1e-127
2	0.42	0.18		-0.01	0.00	0.6714	0.17	0.03	0	0.24	0.06		0.64	0.41
3	0.40	0.16		0.14	0.02	0	0.22	0.05	0	0.32	0.10		0.92	0.84
4	0.44	0.19		0.20	0.04	0	0.29	0.08	0	0.32	0.10		0.90	0.80
5	0.49	0.24		-0.07	0.00	0.0289	-0.03	0.00	0.4425
6	0.49	0.24		0.20	0.04	0	0.18	0.03	0
7	0.48	0.23		0.23	0.05	0	0.13	0.02	0.0003
					24-hour totals (n=93)
		Input			Amplitude			Lag			Lake level			Lake & moulin
Moulin	R	R2	p	R	R2	p	R	R2	p	R	R2	p	R	R2	p
1	0.88	0.78	<1e-30	-0.25	0.06	1.60E-02	0.02	0.00	0.9131	0.70	0.49	<1e-11	0.862	0.74	<1e-13
2	0.93	0.86		-0.08	0.01	0.4578	0.32	0.10	0.058	0.64	0.41		0.6831	0.47
3	0.91	0.83		0.24	0.06	0.0218	0.53	0.28	0.001	0.83	0.69		0.9482	0.90
4	0.90	0.82		0.40	0.16	0.0001	0.71	0.51	0	0.81	0.65		0.933	0.87
5	0.91	0.83		-0.18	0.03	0.0871	-0.34	0.12	0.009
6	0.96	0.92		0.41	0.16	0.0001	0.37	0.14	0.0056
7	0.95	0.90		0.47	0.22	0	0.14	0.02	0.2966
