# Supplementary material for: The impact of surface melt rate and catchment characteristics on Greenland Ice Sheet moulin inputs
Source: Copernicus journal article supplement (doi:10.5194/tc-17-2607-2023), 2023-07-04
Supplement: Supplementary file 1 [file tc-17-2607-2023-supplement.zip › Table_S2-2012.csv]

2012					2-hour model outputs (n=1153)
		Input			Amplitude			Lag			Lake level			Lake & moulin
Moulin	R	R2	p	R	R2	p	R	R2	p	R	R2	p	R	R2	p
1	0.46	0.21	<1e-60	-0.09	0.01	2.30E-03	0.23	0.05	0	0.37	0.14	<1e-31	0.88	0.77	<1e-199
2	0.49	0.24	<1e-60	-0.08	0.01	0.0043	0.28	0.08	0	0.34	0.11	<1e-32	0.74	0.55	<1e-199
3	0.47	0.22	<1e-60	0.06	0.00	0.0622	0.36	0.13	0	0.40	0.16	<1e-33	0.94	0.89	<1e-199
4	0.48	0.23	<1e-60	0.06	0.00	0.0323	0.34	0.12	0	0.39	0.15	<1e-34	0.90	0.81	<1e-199
5	0.54	0.29	<1e-60	-0.15	0.02	0	-0.01	0.00	0.6838
6	0.56	0.31	<1e-60	0.02	0.00	0.4118	0.16	0.02	0
7	0.55	0.30	<1e-60	0.08	0.01	0.0056	0.23	0.05	0
		Input			Amplitude			Lag			Lake level			Lake & moulin
Moulin	R	R2	p	R	R2	p	R	R2	p	R	R2	p	R	R2	p
1	0.91	0.82	<1e-31	-0.23	0.05	2.59E-02	0.59	0.35	0	0.75	0.56	<1e-16	0.8821	0.78	<1e-19
2	0.93	0.87	<1e-31	-0.21	0.05	0.037	0.37	0.14	0.0159	0.72	0.52	<1e-16	0.7663	0.59	<1e-19
3	0.92	0.84	<1e-31	0.05	0.00	0.6155	0.79	0.62	0	0.86	0.74	<1e-16	0.9611	0.92	<1e-19
4	0.88	0.78	<1e-31	0.08	0.01	0.4181	0.68	0.46	0	0.80	0.63888049	<1e-16	0.9251	0.86	<1e-19
5	0.88	0.78	<1e-31	-0.32	0.10	0.0019	-0.27	0.07	0.0376
6	0.95	0.90	<1e-31	0.01	0.00	0.8869	0.46	0.21	0.0005
7	0.94	0.89	<1e-31	0.12	0.01	0.248	0.32	0.10	0.0188
