# Supplementary material for: The impact of surface melt rate and catchment characteristics on Greenland Ice Sheet moulin inputs
Source: Copernicus journal article supplement (doi:10.5194/tc-17-2607-2023), 2023-07-04
Supplement: Supplementary file 1 [file tc-17-2607-2023-supplement.zip › Table_S3-2015.csv]

2015					2-hour model outputs (n=1129)
		Input			Amplitude			Lag			Lake level			Lake & moulin
Moulin	R	R2	p	R	R2	p	R	R2	p	R	R2	p	R	R2	p
1	0.52	0.27	<1e-78	0.08	0.01	1.23E-02	0.11	0.01	0.0043	0.38	0.14	<1e-15	0.78	0.61	<1e-52
2	0.54	0.30		0.15	0.02	0	0.25	0.06	0	0.24	0.06	0.0112	0.44	0.19
3	0.54	0.29		0.35	0.12	0	0.24	0.06	0	0.46	0.21	0	0.92	0.85
4	0.57	0.32		0.33	0.11	0	0.31	0.10	0	0.44	0.19	0	0.89	0.79
5	0.58	0.33		0.15	0.02	0	0.06	0.00	0.0882
6	0.58	0.34		0.42	0.17	0	0.25	0.06	0
7	0.57	0.33		0.42	0.18	0	0.19	0.03	0
					24-hour totals (n=94)
		Input			Amplitude			Lag			Lake level			Lake & moulin
Moulin	R	R2	p	R	R2	p	R	R2	p	R	R2	p	R	R2	p
1	0.95	0.90	<1e-36	0.09	0.01	3.79E-01	0.05	0.00	0.7504	0.70	0.49	<1e-5	0.7939	0.63	<1e-5
2	0.95	0.91		0.24	0.06	0.0223	0.42	0.18	0.0049	0.48	0.23		0.4641	0.22
3	0.96	0.92		0.59	0.35	0	0.44	0.19	0.0067	0.88	0.78	0	0.9512	0.90
4	0.91	0.83		0.55	0.30	0	0.54	0.29	0.0002	0.82	0.68	0	0.9289	0.86
5	0.93	0.86		0.25	0.06	0.0175	0.09	0.01	0.5219
6	0.93	0.87		0.72	0.52	0	0.53	0.29	0.0002
7	0.94	0.87		0.73	0.54	0	0.37	0.14	0.0114
