# Supplementary material for: The impact of surface melt rate and catchment characteristics on Greenland Ice Sheet moulin inputs
Source: Copernicus journal article supplement (doi:10.5194/tc-17-2607-2023), 2023-07-04
Supplement: Supplementary file 1 [file tc-17-2607-2023-supplement.zip › Table_S4-2016.csv]

2016					2-hour model outputs (n=1453)
		Input			Amplitude			Lag			Lake level			Lake & moulin
Moulin	R	R2	p	R	R2	p	R	R2	p	R	R2	p	R	R2	p
1	0.47	0.22	0.1	0.06	0.00	1.53E-02	0.24	0.06	0	0.37	0.14	0	0.88	0.77	<1e-221
2	0.49	0.24		0.09	0.01	0.0008	0.23	0.05	0	0.33	0.11	0.8845	0.71	0.50
3	0.48	0.23		0.25	0.06	0	0.28	0.08	0	0.39	0.15	0	0.93	0.86
4	0.51	0.26		0.33	0.11	0	0.20	0.04	0
5	0.54	0.30		0.01	0.00	0.8396	-0.05	0.00	0.1132
6	0.55	0.30		0.30	0.09	0	0.10	0.01	0.001
7	0.54	0.29		0.30	0.09	0	0.12	0.01	0.0002
					24-hour totals (n=122)
		Input			Amplitude			Lag			Lake level			Lake & moulin
Moulin	R	R2	p	R	R2	p	R	R2	p	R	R2	p	R	R2	p
1	0.92	0.86	<1e-45	0.08	0.01	4.13E-01	0.57	0.33	0	0.75	0.57	<1e-16	0.8822	0.78	<1e-21
2	0.94	0.89		0.14	0.02	0.1281	0.57	0.32	0.0001	0.68	0.46		0.7357	0.54
3	0.94	0.89		0.43	0.18	0	0.73	0.54	0	0.87	0.76		0.9568	0.92
4	0.90	0.82		0.59	0.35	0	0.54	0.29	0	0.81	0.65		0.9261	0.86
5	0.93	0.86		0.00	0.00	0.9918	-0.19	0.04	0.1162
6	0.96	0.92		0.55	0.30	0	0.18	0.03	0.1298
7	0.96	0.91		0.55	0.30	0	0.28	0.08	0.0223
