# Supplementary material for: The impact of surface melt rate and catchment characteristics on Greenland Ice Sheet moulin inputs
Source: Copernicus journal article supplement (doi:10.5194/tc-17-2607-2023), 2023-07-04
Supplement: Supplementary file 1 [file tc-17-2607-2023-supplement.zip › tc-17-2607-2023-supplement-title-page.pdf]

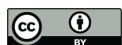

## *Supplement of*

# **The impact of surface melt rate and catchment characteristics on Greenland Ice Sheet moulin inputs**

**Tim Hill and Christine F. Dow**

*Correspondence to:* Tim Hill ([tim\\_hill\\_2@sfu.ca](mailto:tim_hill_2@sfu.ca))

- [tc-17-2607-2023-supplement-title-page.pdf](#)
- [Table\\_S1-2011.csv](#)
- [Table\\_S2-2012.csv](#)
- [Table\\_S3-2015.csv](#)
- [Table\\_S4-2016.csv](#)

The copyright of individual parts of the supplement might differ from the article licence.
